# Supplementary material for: A colorimetric analytical method based on a TCPP–CuCo2O4-like peroxidase for the detection of trichlorfon
Source: Royal Society of Chemistry journal article supplement (doi:10.1039/d3ay01057k), 2023-01-01
Supplement: d3ay01057k1.pdf [file d3ay01057k1.pdf]

# **A colorimetric analytical method based on TCPP- CuCo<sub>2</sub>O<sub>4</sub>-like peroxidase for the detection of trichlorfon**

Xin Xiao<sup>1</sup>, Wenchun Liao<sup>1</sup>, Rao Ma, Long Huang\*, Yunhui Yang\*

*College of Chemistry and Chemical Engineering, Yunnan Normal University,  
Kunming, Yunnan, 650500, P.R. China*

<sup>1</sup> These authors contributed equally.

\*To whom correspondence should be addressed.

E-mail: [longhuang@ynnu.edu.cn](mailto:longhuang@ynnu.edu.cn) ; [yyhui2002@aliyun.com](mailto:yyhui2002@aliyun.com)

**1. Effect of concentration of TCPP-CuCo<sub>2</sub>O<sub>4</sub> on the absorbance values of ox-TMB at 652 nm**

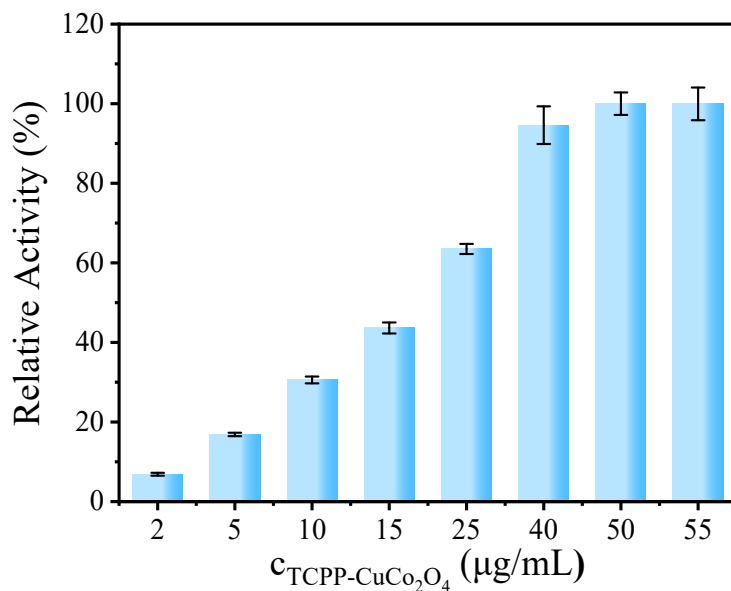

**Fig. S1** Effect of concentration of TCPP-CuCo<sub>2</sub>O<sub>4</sub> on the absorbance values in NaAc-HAc buffer (The concentration of TMB and H<sub>2</sub>O<sub>2</sub> was fixed at 0.12 mmol/L and 12 mmol/L, respectively; reaction time: 8 min; pH 4.5)

**2. Effect of reaction time on the absorbance values of ox-TMB at 652 nm**

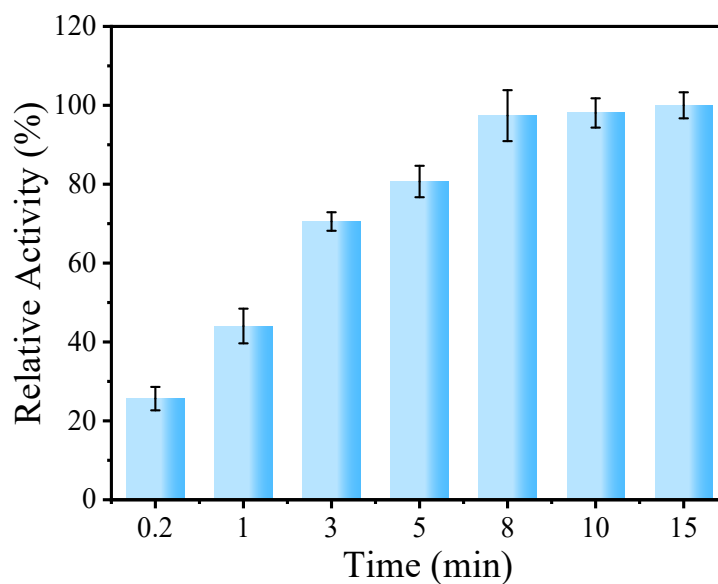

**Fig. S2.** Effect of color development time on relative activity in NaAc-HAc buffer (The concentration of TMB and H<sub>2</sub>O<sub>2</sub> was fixed at 0.12 mmol/L and 12 mmol/L, respectively; concentration of TCPP-CuCo<sub>2</sub>O<sub>4</sub> was fixed at 40 μg/mL; pH 4.5)

### 3. Effect of type of buffer solution on the absorbance values of ox-TMB at 652 nm

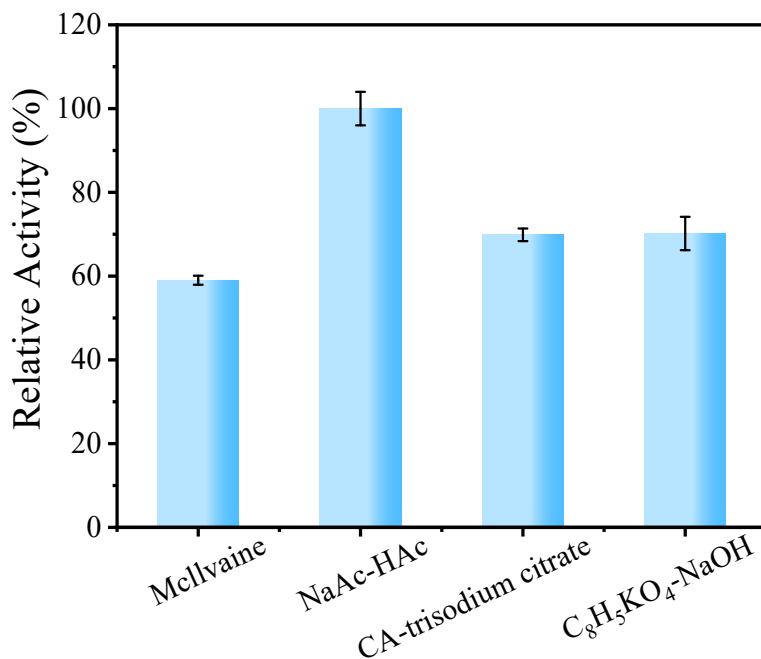

**Fig.S3** Effect of buffer type on relative activity (The concentration of TMB and H<sub>2</sub>O<sub>2</sub> was fixed at 0.12 mmol/L and 12 mmol/L, respectively; concentration of TCPP-CuCo<sub>2</sub>O<sub>4</sub> was fixed at 40 µg/mL; reaction time: 8 min; pH was fixed at 4.5)

### 4. Effect of pH of buffer solution on the absorbance values of ox-TMB at 652 nm

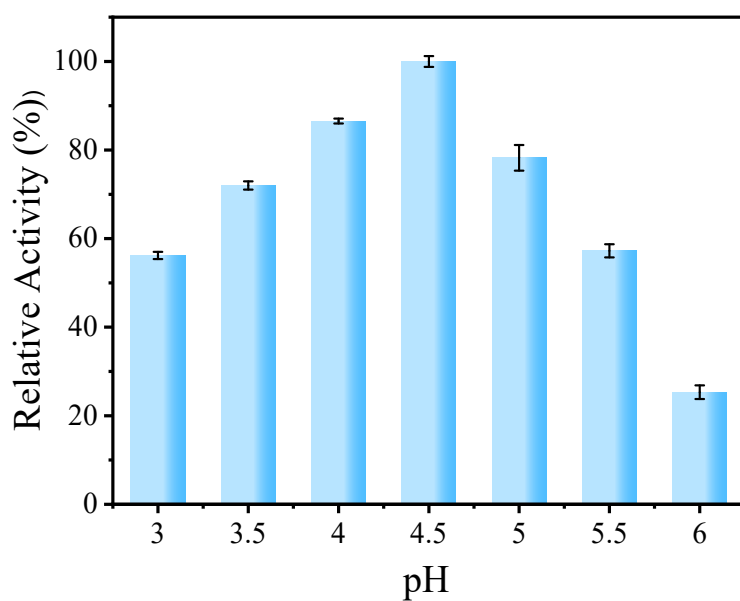

**Fig. S4** Effect of buffer pH on relative activity (The concentration of TMB and H<sub>2</sub>O<sub>2</sub> was fixed at 0.12 mmol/L and 12 mmol/L, respectively; concentration of TCPP-CuCo<sub>2</sub>O<sub>4</sub> was fixed at 40 µg/mL; reaction time: 8 min)

## 5. Effect of concentration of TCPP-CuCo<sub>2</sub>O<sub>4</sub> on $\Delta A$

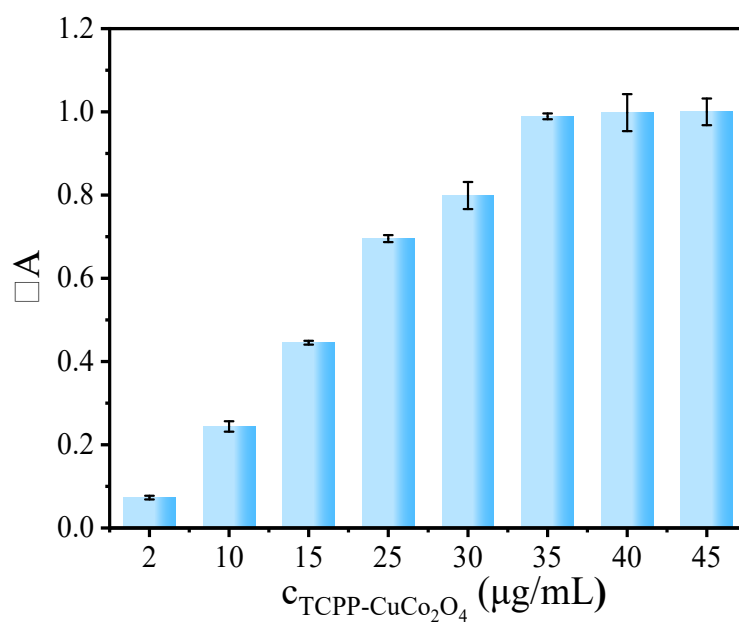

Fig. S5 Effect of concentration of TCPP-CuCo<sub>2</sub>O<sub>4</sub> on  $\Delta A$

## 6. Effect of concentration of ATCh on $\Delta A$

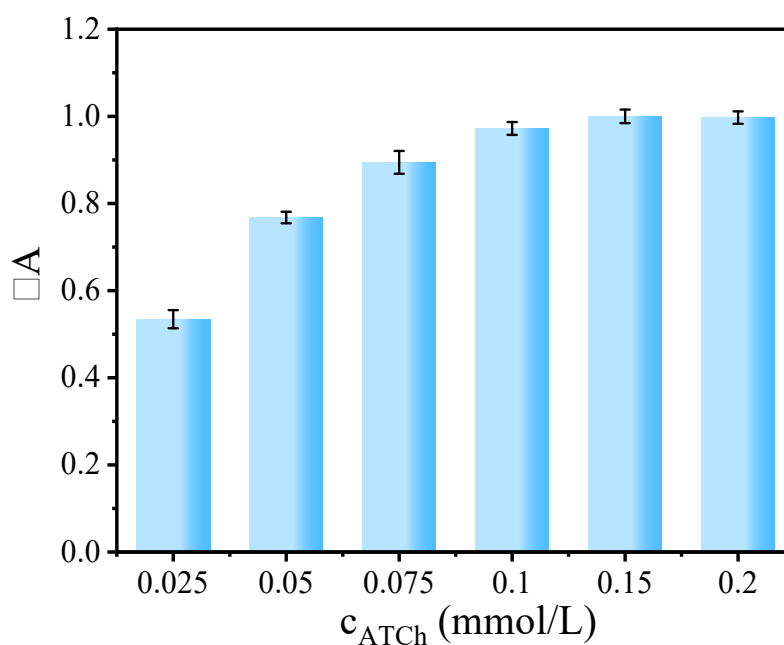

Fig. S6 Effect of concentration of ATCh on  $\Delta A$  (The concentration of TCPP-CuCo<sub>2</sub>O<sub>4</sub> was fixed at 35  $\mu\text{g/mL}$ )
